# Supplementary material
Source: publisher site journal article supplement (https://www.dovepress.com/article/292152)
Supplement: Supplementary file 1 [file get_supplementary_file.php]

# Appendix: Questionnaire

**Part 1: Collection of Surgeon and Procedure Demographics and Characteristics**

| **Question** | **Response Type** |
| --- | --- |
| 1a) Position | MC & OE (resident, fellow, attending, other [please specify]) |
| 1b) Specialty | MC (retinal surgery, cataract surgery, MIGS, corneal surgery, none of above) |
| 1c) Number of years practicing ophthalmology, 1d) Age | Number select (years) |
| 1e) Sex | MC (M/F/refuse to answer) |
| 1f) Height (ft/in), 1g) Weight (lbs) | Number select |
| 2) Do you work at a teaching facility? | Yes/No |
| 2a) If Yes, please estimate the proportion of time you occupy the assistant versus the surgeon chair. | Number select (% assistant, % primary surgeon) |
| 3) When did you personally start using a heads-up display for surgeries? | MC (month/year) |
| 4) Please select the heads-up display platform you currently use | MC & OE (NGENUITY®, TrueVision®, other) |
| 5) Please estimate the total number of procedures you have completed with this technology in the past 12* months: | Number select |
| 6) Do you suffer from chronic neck or back pain/discomfort? | Yes/No & OE (if yes, how long) |
| 7) Please rank your average headache severity on a scale of 0-10. Select 0 if you do not experience headaches. | Number select (0-10) |
| 8) Please rank your average level of neck/back pain/discomfort on a scale of 0-10. Select 0 if you do not experience neck/back pain. | Number select (0-10) |
| 9) Do you have a history of injury or surgery to the neck or back? | Yes/No & OE (if yes, please explain) |
| 10) Have you missed any time at work, including operating room time, due to pain? | Yes/No & OE (if yes, please quantify) |
| 11) Which factors determine the use of the heads-up display at your facility? (Select all that apply) | Multi-Selection & OE (if other, please specify) |
| 12) Please indicate the time(s) of the week in which you typically perform operations | Multi-Selection |
| 13) How long is a typical operating session for you? | Number select (hours) |
| 14) Please estimate the time it takes you to complete an average case (ie, a surgery): | Number select (minutes) |
| 15) Please estimate the total number of cases you complete in a typical: a) operating session b) annually | Number select |
| 16) How many rooms do you operate out of for ophthalmology cases at your facility? | Number select |
| 16a) How many of these rooms have a heads-up display? | Number select |
| 16b) Please estimate the proportion of your cases completed with heads-up display: | Number select (1-100%) |
| 17) Select the operating position used in the majority of your cases: | MC (superior, temporal, mixed) |
| 18) Describe the location of the heads-up display in the context of your operating position: | MC |
| 19) With which brand of microscope is the heads-up display integrated? | MC & OE |
| 20) Describe the type of microscope | MC (floor mounted, ceiling mounted) |
| 21) If you complete retinal surgeries, please describe the lens system you use for high-magnification membrane peeling: | MC & OE (if other, please specify) |
| 22) If you complete retinal surgeries, please select which wide-angle viewing system you use: | MC & OE (if other, please specify) |
| MC=Multiple choice; MIGS=Minimally invasive glaucoma surgery; OE=Open ended. | |

**Part 2: Nordic Musculoskeletal Questionnaire**

SeeKuorinka et al, (1987)15 Figure 1, Panel 3 (Page 3).

| **Question** | **Response Type** |
| --- | --- |
| Have you at any time during the last 12 months had trouble (ache, pain, discomfort, numbness) in: a) Neck b) Upper Back c) Lower Back d) Shoulders (Right/Left) | Yes/No |
| Have you at any time during the last 12 months been prevented from doing your normal work (at home or away from home) because of the trouble? a) Neck b) Upper Back c) Lower Back d) Shoulders (Right/Left) | Yes/No |
| Have you had trouble at any time during the last 7 days? a) Neck b) Upper Back c) Lower Back d) Shoulders (Right/Left) | Yes/No |

**Part 3:** **Custom questions** **comparing heads-up displays and microscope**

| **Question** | **Response Type** |
| --- | --- |
| 1) Do you feel using a conventional microscope over your career has had a negative impact on your health? | Yes/No |
| 2) If you have experienced headaches, have your headaches improved after introducing the heads-up display in the operating room? | Yes/No/N/A |
| 3) Do you currently feel less pain/discomfort when you operate heads up compared with conventional microscope? | Yes/No/N/A |
| 4) Thinking back to a time when you ONLY used conventional microscope, has your trouble (ache, pain, discomfort, numbness) today improved with the use of heads-up display? | Yes/No/N/A |
| 4a) If YES, select the level of improvement for each body part: Neck, Upper Back, Lower back (small of back), Shoulders (right, left) | Likert scale (1-5) |
| 5) COMPARED TO CONVENTIONAL MICROSCOPE, the use of a heads-up visualization system in the operating room a) has reduced the severity of pain and discomfort, b) has reduced the frequency of pain and discomfort, c) has improved my posture, d) has improved my overall comfort during surgery, e) has improved my mental performance (eg, ability to focus, mental clarity), f) has improved my physical performance (eg, fatigue, stamina, mobility), g) has improved my confidence in my ability to perform complex procedures, h) allows me to better visualize the areas and angles required for the procedure, i) allows me to operate more comfortably under higher magnification. | MC (strongly disagree, disagree, neutral, agree, strongly agree) |
| 6) All things considered, do you prefer the heads-up display or conventional microscope? | MC |
| 6a) What is the main reason for this preference? | OE |
| 7) Would you recommend heads-up visualization to your peers? | Yes/No |
| MC=Multiple choice; N/A=Not Applicable; OE=Open ended | |
